# Supplementary material for: Multimode ultrasonic technique is recommended for the differential diagnosis of thyroid cancer
Source: PeerJ. 2020 May 4;8:e9112. doi: 10.7717/peerj.9112 (PMC7204870; doi:10.7717/peerj.9112)
Supplement: Supplemental Information 8 — A total of 196 thyroid nodules from 185 patients were analyzed in this study. [file peerj-08-9112-s008.csv]

sex	age	DiamTrans	DiamAP	DiamSag	echotexture	Echogenicity	Margin	A/T sag	A/T Trans	calcification	Doppler color	TI -RADS	SWE100	MAX	MIN	MEAN	SD	RATIO	contrast	Diag-contrast	histology	hist index
female	43	7.5	6.1	8.5	solid	hypo	regular	<1	<1	absence	type 3	4b	dot-like	39.8	10.5	20.7	8	3.33	iso	nodular goiters	nodular goiters	benign
female	46	6.6	4.2	8.2	solid	hypo	regular	<1	<1	absence	type 2	4b	colorful	48	16.8	23.8	12	1.8	hyper	adenomatous nodular goiters	follicular adenoma	benign
female	49	6.4	5.8	6.3	solid	hypo	regular	>1	>1	absence	type 3	4a	hard cir-sign	118	28.5	35.5	20.1	2.4	hypo	adenoma	papillar carcinoma	malignant
female	46	6.9	5.8	8.2	solid	hypo	regular	<1	<1	absence	type 3	4a	colorful	65.1	11.9	21.4	6.3	1.8	iso	nodular goiters	nodular goiters	benign
male	65	5.8	5.3	6.3	solid	hypo	regular	<1	<1	microcalcification	type 3	4c	colorful	108.9	25.6	38.9	35.7	2.9	hypo	adenoma	metasstatic carcinoma	malignant
female	36	5.5	6.4	6.7	solid	hypo	regular	<1	>1	absence	type 3	3	neg	96	18	40.2	35.6	2.6	hypo	adenoma	folli-papillary carcinoma	malignant
female	46	6.1	6.5	6.8	solid	hypo	regular	>1	>1	absence	type 3	4c	hard cir-sign	98.7	17.5	39	19.1	3.1	hypo	adenoma	papillar carcinoma	malignant
female	29	7.9	8.6	8.1	solid	hypo	irregular	>1	>1	microcalcification	type 3	3	dot-like	94	10.1	38	29.8	3.2	hypo	adenoma	medullary cell carcinoma	malignant
female	56	13.1	10.3	17.9	solid	iso	regular	<1	<1	absence	type 2	4a	hard cir-sign	56	3.4	26.1	17.3	1.9	hyper	adenomatous nodular goiters	follicular adenoma	benign
female	37	6.3	6	6.6	solid	hypo	regular	<1	<1	microcalcification	type 3	3	dot-like	88.9	12	47.6	32	2.8	hypo	adenoma	folli-papillary carcinoma	malignant
male	32	7.8	8	9.9	solid	hypo	regular	>1	<1	microcalcification	type 3	4c	colorful	66.7	10.1	24.3	12	2.8	hypo	adenoma	adenoma	benign
female	26	11.5	14.6	11.7	solid	hypo	regular	>1	>1	microcalcification	type 3	4c	colorful	95.2	25.6	46.6	22.7	3	hypo	adenoma	papillar carcinoma	malignant
female	64	9.6	6.4	11.7	solid	hypo	regular	<1	<1	absence	type 3	4a	dot-like	49.8	11.7	25.8	17.5	1.2	iso	nodular goiters	nodular goiters	benign
female	58	5.7	5.1	6	solid	hypo	regular	<1	<1	absence	type 3	4b	neg	67	15.7	33.6	17	1.6	iso	nodular goiters	nodular goiters	benign
female	52	6.4	5.9	5.8	solid	hypo	regular	<1	<1	absence	type 3	5	dot-like	28.8	10.1	27.3	17	0.9	iso	nodular goiters	nodular goiters	benign
male	41	7.8	7.3	7.3	solid	hypo	regular	<1	<1	absence	type 3	4c	dot-like	43.4	10.6	22.1	18.1	1.7	iso	nodular goiters	nodular goiters	benign
female	29	5.2	5.3	5.1	solid	hypo	regular	<1	<1	absence	type 3	4b	dot-like	37.8	18.2	22.6	18.4	1.5	iso	nodular goiters	nodular goiters	benign
male	57	7.4	6.1	6.6	solid	hypo	regular	<1	<1	absence	type 3	4c	colorful	36.1	16.5	35.5	16.7	2.5	iso	nodular goiters	nodular goiters	benign
female	52	6.2	7	7.2	solid	hypo	regular	<1	<1	absence	type 3	4c	dot-like	106.4	9.9	36.7	18.3	3.1	hypo	adenoma	papillar carcinoma	malignant
male	36	8.1	10.1	6.6	solid	hypo	regular	>1	>1	absence	type 3	4c	hard cir-sign	32.3	12.5	21.5	17.5	2.9	hypo	adenoma	adenoma	benign
female	38	5.8	5	5.3	solid	hypo	regular	<1	<1	absence	type 1	4c	neg	99.5	13	40	16.9	3.9	hypo	adenoma	folli-papillary carcinoma	malignant
male	63	6.6	9.4	9.9	solid	hypo	irregular	>1	>1	macrocalcification	type 3	4c	colorful	96	17.8	38.9	15.3	2	hypo	adenoma	metasstatic carcinoma	malignant
female	48	10	12.4	11.6	solid	hypo	regular	>1	>1	macrocalcification	type 3	4c	hard cir-sign	89.7	19	32.6	16.3	1.9	hypo	adenoma	papillar carcinoma	malignant
female	62	8	10.6	10.9	solid	iso	regular	<1	<1	macrocalcification	type 3	4a	colorful	67.5	8.5	20.6	16.5	1.3	iso	nodular goiters	nodular goiters	benign
female	64	14.1	14.2	21.6	solid	hypo	regular	<1	>1	absence	type 2	4c	hard cir-sign	58.5	7.8	20.5	15.9	1.9	hyper	adenomatous nodular goiters	follicular adenoma	benign
female	25	12.6	11.9	15.9	solid	hypo	regular	<1	<1	macrocalcification	type 3	4b	dot-like	77.3	9.4	24.3	18.1	2	iso	nodular goiters	nodular goiters	benign
female	62	6.1	5.7	8.1	solid	hypo	irregular	<1	<1	absence	type 3	4a	neg	108.7	16.8	40.1	17.4	5.8	hypo	adenoma	papillar carcinoma	malignant
female	29	17.7	9.1	13.4	solid	hypo	regular	<1	>1	absence	type 3	4c	hard cir-sign	43.2	18.9	26.9	17	1.2	iso	nodular goiters	nodular goiters	benign
female	63	5.3	5.7	6.8	solid	hypo	regular	>1	>1	absence	type 3	4c	hard cir-sign	107.8	10.1	35.4	16.8	1.8	hypo	adenoma	papillar carcinoma	malignant
female	35	6.7	5.8	6.7	solid	hypo	regular	<1	<1	macrocalcification	type 3	4c	hard cir-sign	55.4	12.3	30.6	17.1	1.9	iso	nodular goiters	nodular goiters	benign
male	48	9.3	8.2	9.5	solid	hypo	regular	<1	<1	absence	type 3	4b	hard cir-sign	48	16	35	17.7	1.2	iso	nodular goiters	nodular goiters	benign
female	57	5	5	5	solid	hypo	regular	<1	<1	absence	type 3	5	colorful	67	20	29.1	17.2	1.4	iso	nodular goiters	nodular goiters	benign
female	61	14.1	12.2	16.9	solid	hypo	irregular	<1	<1	absence	type 3	4c	hard cir-sign	75.6	18	37.2	17.8	3.6	hypo	adenoma	papillar carcinoma	malignant
female	67	22.4	20.4	33.5	solid	hypo	regular	<1	<1	absence	type 3	4b	dot-like	64	10.1	23.5	16.6	0.8	iso	nodular goiters	nodular goiters	benign
female	26	18.4	17.2	28.3	solid	hypo	regular	<1	<1	absence	type 3	3	colorful	40.8	11.4	37.2	17.6	1.4	hyper	adenomatous nodular goiters	follicular adenoma	benign
female	44	5.2	6.8	7.2	solid	hypo	irregular	>1	>1	macrocalcification	type 1	4c	hard cir-sign	105	20.8	36.8	17.5	4	hypo	adenoma	papillar carcinoma	malignant
female	39	8.8	9.1	7.8	solid	hypo	irregular	<1	>1	macrocalcification	type 3	4c	hard cir-sign	82.9	11.8	38.2	16.8	1.7	hypo	adenoma	folli-papillary carcinoma	malignant
female	30	8.9	9	8	solid	hypo	regular	>1	<1	absence	type 3	4c	colorful	89.1	19.7	33.2	15.7	1.6	hyper	adenomatous nodular goiters	follicular adenoma	benign
female	42	13.4	9.9	18.9	solid	iso	regular	<1	<1	absence	type 2	4a	neg	32	12.3	23.8	17.3	1	hyper	adenomatous nodular goiters	follicular adenoma	benign
male	44	7.4	6.2	6.7	solid	hypo	regular	<1	<1	microcalcification	type 3	4c	colorful	77.3	18.7	41	14.3	0.9	hypo	adenoma	papillar carcinoma	malignant
female	30	25	17.4	21.6	solid	iso	regular	<1	<1	absence	type 3	4a	colorful	42.42	10.7	24	16.6	1.8	iso	nodular goiters	nodular goiters	benign
female	46	9.4	8.6	11.4	solid	hypo	irregular	<1	<1	absence	type 3	3	colorful	57	12	36	17	4.9	iso	nodular goiters	nodular goiters	benign
female	52	22	15.6	24.4	solid	iso	regular	<1	<1	absence	type 2	4a	hard cir-sign	42.5	13.8	24.8	18.9	1.3	hyper	adenomatous nodular goiters	follicular adenoma	benign
male	59	20.1	15.1	27.5	solid	hypo	regular	<1	<1	absence	type 2	4b	colorful	24.5	9.9	12.3	15.5	1.2	hyper	adenomatous nodular goiters	follicular adenoma	benign
female	40	7.3	5.7	7.8	sponge	mixtureechogenicity	regular	<1	<1	absence	type 3	3	neg	67	8.2	29.6	16.6	1.4	iso	nodular goiters	nodular goiters	benign
female	66	6	6.6	9	solid	hypo	regular	<1	>1	microcalcification	type 3	4c	colorful	83	12.4	43	16.9	3.5	hypo	adenoma	papillar carcinoma	malignant
male	52	5.3	5.8	7	solid	hypo	regular	<1	>1	absence	type 3	4c	colorful	92.1	29	55	17.2	2.8	hypo	adenoma	folli-papillary carcinoma	malignant
female	55	9.1	5.2	9.5	solid	hypo	regular	<1	<1	absence	type 3	4a	neg	35	16.6	20.2	17.8	1.5	iso	nodular goiters	nodular goiters	benign
male	26	19.5	15.1	22.9	sponge	iso	regular	<1	<1	microcalcification	type 2	4b	colorful	95	19.5	33.6	17	0.7	hyper	adenomatous nodular goiters	follicular adenoma	benign
female	53	13.8	12.8	28.6	sponge	mixtureechogenicity	regular	<1	<1	absence	type 3	3	neg	48	9.2	16.62	17.1	1.34	iso	nodular goiters	nodular goiters	benign
female	52	7.7	8.8	9.3	solid	hypo	irregular	<1	>1	absence	type 3	4c	hard cir-sign	56	10.2	21.8	16	2.9	iso	nodular goiters	nodular goiters	benign
male	39	12.1	8.2	14.2	solid	hypo	irregular	<1	<1	microcalcification	type 3	5	colorful	88	35.3	40.6	15	3.46	hypo	adenoma	papillar carcinoma	malignant
female	80	25.5	15.5	23.9	solid	iso	regular	<1	<1	absence	type 2	4a	hard cir-sign	95	11.6	21.22	16.5	1.18	hyper	adenomatous nodular goiters	follicular adenoma	benign
female	25	19.4	14.8	23.4	solid	mixtureechogenicity	regular	<1	<1	macrocalcification	type 3	4a	colorful	30.1	12.3	35	16.6	2.04	iso	nodular goiters	nodular goiters	benign
female	32	15.9	10	24.7	solid	hypo	irregular	<1	<1	macrocalcification	type 3	4c	colorful	45.6	16.7	29	17.6	2.48	iso	nodular goiters	nodular goiters	benign
female	50	15.4	10.5	21.2	solid	iso	regular	<1	<1	absence	type 2	4a	neg	31.58	10.9	30	16.6	1.78	hyper	adenomatous nodular goiters	follicular adenoma	benign
female	48	9.5	5.9	8.3	solid	hypo	regular	<1	<1	microcalcification	type 3	4c	neg	25.38	13.1	53.1	15.3	3.36	hypo	adenoma	folli-papillary carcinoma	malignant
female	54	7.9	9	9.2	solid	hypo	regular	<1	>1	absence	type 3	5	neg	29.72	20.6	28.9	17.5	3.5	hypo	adenoma	papillar carcinoma	malignant
male	29	7	8.2	6.9	solid	hypo	regular	>1	>1	absence	type 1	5	hard cir-sign	45	12.4	32.9	16.4	2.7	hypo	adenoma	papillar carcinoma	malignant
male	56	13.2	11.6	13.5	solid	hypo	regular	<1	<1	absence	type 3	4b	colorful	107	9.8	40	17	4.06	hypo	adenoma	folli-papillary carcinoma	malignant
male	84	9.7	10.7	9.7	solid	hypo	irregular	<1	<1	absence	type 3	5	colorful	109	18	21.5	17.9	3.49	hypo	adenoma	medullary cell carcinoma	malignant
female	58	16.6	16.6	21.2	solid	hypo	regular	<1	<1	absence	type 3	4b	colorful	23	10.6	55.3	17	2.58	iso	nodular goiters	nodular goiters	benign
female	39	11.8	11.1	14.1	solid	hypo	irregular	<1	<1	absence	type 3	4c	colorful	98	18.9	40	7.4	5.1	hypo	adenoma	papillar carcinoma	malignant
female	49	15.7	11.5	16	solid	iso	regular	<1	<1	absence	type 2	4a	colorful	62.96	24	32.74	6.7	2.9	hyper	adenomatous nodular goiters	follicular adenoma	benign
female	48	10	8.7	13.5	solid	hypo	regular	<1	<1	absence	type 3	4b	hard cir-sign	52	14	12.98	7.8	1.44	hyper	adenomatous nodular goiters	follicular adenoma	benign
female	69	7.9	8.5	9.1	solid	hypo	irregular	>1	>1	absence	type 3	4c	colorful	104	27.9	35.56	15.1	2.1	hypo	adenoma	papillar carcinoma	malignant
female	46	6.2	5.2	7.7	solid	hypo	irregular	<1	<1	microcalcification	type 3	5	hard cir-sign	60.9	19.86	33.9	16.7	3.12	hypo	adenoma	papillar carcinoma	malignant
female	67	12	10.8	9.6	solid	hypo	regular	<1	<1	macrocalcification	type 3	4b	hard cir-sign	45.94	17.7	31.3	18.5	1.36	iso	nodular goiters	nodular goiters	benign
female	33	8.1	6.8	5.2	solid	hypo	irregular	<1	<1	microcalcification	type 3	4c	neg	94.22	23.6	38.5	17.1	2.88	hypo	adenoma	folli-papillary carcinoma	malignant
female	26	24.6	14.4	13.7	solid	hypo	irregular	<1	<1	absence	type 3	4c	hard cir-sign	71.52	20.8	29.9	16.4	1.64	hyper	adenomatous nodular goiters	follicular adenoma	benign
male	31	19.5	14	13.5	solid	hypo	irregular	<1	<1	microcalcification	type 2	5	colorful	113.68	11.5	33.8	16.2	2.09	hypo	adenoma	papillar carcinoma	malignant
female	47	5.6	5	7.4	solid	hypo	regular	>1	>1	absence	type 3	4c	hard cir-sign	58	25.6	29.8	16.2	3.44	hypo	adenoma	folli-papillary carcinoma	malignant
male	27	30.2	22.7	22.2	solid	hypo	regular	<1	<1	macrocalcification	type 2	4c	colorful	101.84	11.2	15.67	16.5	2.72	hyper	adenomatous nodular goiters	follicular adenoma	benign
female	47	18.2	13	12	solid	iso	regular	<1	<1	macrocalcification	type 3	4a	colorful	63.72	21.62	27.8	18.9	3.1	hyper	adenomatous nodular goiters	follicular adenoma	benign
female	53	5.2	5	5	solid	hypo	regular	<1	<1	absence	type 3	4b	hard cir-sign	79.04	26.8	39.1	17	2.88	hyper	adenomatous nodular goiters	follicular adenoma	benign
female	56	18.1	14.7	8.3	mix	hypo	regular	<1	<1	absence	type 3	3	hard cir-sign	39.8	14.8	30.56	15	1.44	iso	nodular goiters	nodular goiters	benign
female	37	36.6	29.1	25.3	solid	iso	regular	<1	<1	absence	type 2	4a	neg	21	13.7	27.8	1.4	0.8	hyper	adenomatous nodular goiters	follicular adenoma	benign
female	45	11.4	8.4	10.2	solid	hypo	regular	>1	>1	absence	type 3	4c	hard cir-sign	111.88	21.5	16.8	17	2.9	iso	nodular goiters	nodular goiters	benign
female	16	23.8	18.8	15.2	solid	hypo	regular	<1	<1	absence	type 3	4b	colorful	94	9.8	43	15.2	1.33	iso	nodular goiters	nodular goiters	benign
male	38	10.6	8.2	8.5	solid	hypo	regular	<1	<1	macrocalcification	type 3	5	dot-like	43.66	10	22.18	18.1	1.2	iso	nodular goiters	nodular goiters	benign
male	48	16.2	11.9	15.4	solid	hypo	irregular	<1	>1	microcalcification	type 3	4c	hard cir-sign	117.43	9.7	30	36	2.7	hypo	adenoma	papillar carcinoma	malignant
female	34	8.9	7.6	6.4	solid	hypo	regular	<1	<1	absence	type 3	4b	hard cir-sign	46	17.2	29.44	5.6	1.4	iso	nodular goiters	nodular goiters	benign
female	47	8.2	6.7	5.7	mix	iso	regular	<1	<1	absence	type 3	3	neg	54	14.8	25.62	11.6	1.13	iso	nodular goiters	nodular goiters	benign
female	43	5.7	5.7	6.7	solid	hypo	irregular	>1	>1	absence	type 3	4c	neg	46	19.7	44.4	17.2	1.34	hypo	adenoma	folli-papillary carcinoma	malignant
female	61	6	6.6	6.3	solid	iso	regular	<1	<1	circucalcification	type 3	4a	neg	39	9.4	28.9	17.1	1.28	iso	nodular goiters	nodular goiters	benign
female	41	13.3	11.2	10.6	solid	hypo	irregular	<1	<1	macrocalcification	type 3	4c	hard cir-sign	65.26	9.9	26.8	18.4	3	hypo	adenoma	papillar carcinoma	malignant
female	52	10.8	6.9	5	solid	hypo	regular	<1	<1	absence	type 2	4b	neg	94	13.4	28	17.2	1.28	hyper	adenomatous nodular goiters	follicular adenoma	benign
female	27	8.4	8.2	7.5	solid	hypo	irregular	<1	<1	microcalcification	type 3	3	colorful	57.26	33	33.8	19.4	1.16	hypo	adenoma	adenoma	benign
female	55	8.6	7.8	5.5	solid	iso	regular	<1	<1	absence	type 2	4a	neg	24.42	12	29.3	17	1.08	hyper	adenomatous nodular goiters	follicular adenoma	benign
male	41	8.2	7.9	6.6	solid	hypo	regular	<1	<1	microcalcification	type 3	4c	hard cir-sign	104.8	13.57	49.34	16.3	3.1	hypo	adenoma	papillar carcinoma	malignant
male	54	16	14.7	12.9	mix	iso	regular	<1	<1	absence	type 2	3	hard cir-sign	56.82	16.86	32	16.8	2.5	hyper	adenomatous nodular goiters	follicular adenoma	benign
male	37	23.7	18	12.1	solid	hypo	regular	<1	<1	absence	type 3	4b	neg	37.08	19.7	30	17	0.9	iso	nodular goiters	nodular goiters	benign
female	41	12.2	11.6	11.9	solid	hypo	irregular	<1	<1	microcalcification	type 3	4c	hard cir-sign	79.89	12	50.34	14.4	1.98	hypo	adenoma	papillar carcinoma	malignant
female	44	5.9	5.3	7.6	solid	hypo	regular	>1	>1	absence	type 3	4c	dot-like	36	19.88	49.76	17.9	2.66	hypo	adenoma	folli-papillary carcinoma	malignant
female	25	11.5	7	5.5	mix	iso	regular	<1	<1	absence	type 3	3	neg	19.24	13.1	30.8	17.3	1.36	iso	nodular goiters	nodular goiters	benign
female	44	11.6	7.3	7.5	solid	hypo	regular	<1	>1	microcalcification	type 3	4c	colorful	65.56	10.6	51.23	16.3	3.88	hypo	adenoma	papillar carcinoma	malignant
female	42	12.3	10.1	9.4	solid	hypo	irregular	<1	<1	microcalcification	type 3	5	colorful	21.52	36	38.8	17.4	3.6	hypo	adenoma	folli-papillary carcinoma	malignant
male	32	9	8	8	solid	hypo	regular	<1	<1	absence	type 1	4b	colorful	40.1	14.6	30.1	16.8	1.86	iso	nodular goiters	nodular goiters	benign
male	35	12.1	8.2	6.8	solid	hypo	irregular	<1	<1	microcalcification	type 3	5	hard cir-sign	78	17.5	51	16.4	3.6	hypo	adenoma	papillar carcinoma	malignant
female	46	10.3	10.4	9.4	solid	hypo	irregular	<1	<1	microcalcification	type 3	4c	hard cir-sign	46	23	48	17.4	2.76	hypo	adenoma	folli-papillary carcinoma	malignant
female	27	17.9	18.8	13.6	solid	hypo	irregular	<1	<1	microcalcification	type 3	4c	colorful	67	14	40.9	16.3	3.1	hypo	adenoma	papillar carcinoma	malignant
female	40	6.9	6.2	9	solid	hypo	irregular	<1	>1	macrocalcification	type 3	5	colorful	103	25.6	38.9	17.3	3.42	hypo	adenoma	papillar carcinoma	malignant
female	39	10.2	5.7	6.9	solid	hypo	regular	<1	>1	absence	type 3	4c	hard cir-sign	39.2	16.9	30.33	17	2.6	hypo	adenoma	papillar carcinoma	malignant
female	44	8	6.3	7.3	solid	hypo	irregular	>1	>1	microcalcification	type 3	3	colorful	59	20.3	40.8	16.8	4.2	hypo	adenoma	folli-papillary carcinoma	malignant
female	44	18.7	9.4	12.3	solid	iso	regular	<1	>1	absence	type 2	4a	colorful	66.43	11.8	28	3.5	2.6	hyper	adenomatous nodular goiters	follicular adenoma	benign
female	45	9.1	6.6	8.5	mix	mixtureechogenicity	regular	<1	>1	absence	type 1	3	neg	14	14.1	22.32	7.8	1.38	iso	nodular goiters	nodular goiters	benign
female	45	11.7	10	9.8	solid	hypo	irregular	<1	<1	microcalcification	type 3	4c	colorful	65.32	9.2	39	18.7	3.78	hypo	adenoma	papillar carcinoma	malignant
male	49	15.4	12.8	14.8	solid	hypo	irregular	<1	>1	microcalcification	type 3	3	colorful	130	23.5	40	17	5.1	hypo	adenoma	folli-papillary carcinoma	malignant
female	63	9.2	9.3	9.4	solid	hypo	irregular	<1	>1	absence	type 3	4c	dot-like	10.8	9.8	38.9	16.8	1.86	hypo	adenoma	medullary cell carcinoma	malignant
female	50	9.3	6.1	5.5	sponge	mixtureechogenicity	regular	<1	<1	absence	type 3	3	neg	35.67	14.2	30.1	14.2	1.7	iso	nodular goiters	nodular goiters	benign
female	50	7.9	5.1	7.5	solid	hypo	irregular	>1	>1	absence	type 3	4c	neg	128	30.8	28.9	18.8	1.16	hypo	adenoma	papillar carcinoma	malignant
female	46	22.7	19.8	12.5	solid	hypo	irregular	<1	<1	absence	type 3	4c	colorful	123.4	20.9	26.6	4.1	2.38	hyper	adenomatous nodular goiters	follicular adenoma	benign
female	41	10.4	10	9	solid	hypo	regular	<1	<1	circucalcification	type 3	4a	hard cir-sign	14	7.7	28	15.7	2.46	iso	nodular goiters	nodular goiters	benign
female	26	9.9	7.1	12.8	solid	hypo	regular	<1	<1	absence	type 3	4a	colorful	76.7	10.6	23	16	2	hyper	nodular goiters	nodular goiters	benign
female	66	7.2	7.6	8.3	solid	hypo	irregular	<1	<1	microcalcification	type 3	4c	colorful	68	14.2	24.6	17.3	3.1	hypo	adenoma	papillar carcinoma	malignant
female	63	7.1	6.3	5.1	solid	hypo	regular	<1	<1	macrocalcification	type 3	4c	colorful	78	18.9	30	15.3	1.9	iso	nodular goiters	nodular goiters	benign
female	28	10	11.5	13.9	mix	mixtureechogenicity	regular	<1	<1	microcalcification	type 3	4b	hard cir-sign	35.5	15	31.2	16.6	1.6	iso	nodular goiters	papillar carcinoma	malignant
female	33	9.8	7.7	7	solid	iso	regular	<1	<1	absence	type 3	4a	colorful	67	16.4	24.9	15.7	1.8	iso	nodular goiters	nodular goiters	benign
female	43	6.7	6.8	6.7	solid	hypo	regular	>1	>1	absence	type 3	4b	colorful	14.7	7.9	56	4.3	1.4	iso	adenoma	papillar carcinoma	malignant
female	36	8	5.8	8.3	solid	hypo	regular	<1	<1	absence	type 3	4a	hard cir-sign	57	13.5	38.3	16.2	7	iso	nodular goiters	nodular goiters	benign
male	48	8.8	6.1	9.3	solid	hypo	regular	<1	<1	absence	type 3	4b	colorful	28.9	16.2	33	17.4	1.4	iso	nodular goiters	subacute thyroiditis	benign
female	47	7.7	4.5	7.8	solid	hypo	regular	<1	<1	absence	type 3	4b	colorful	21	12.4	32	16.8	1.8	iso	nodular goiters	nodular goiters	benign
female	48	9.1	12.2	10.4	solid	iso	regular	>1	>1	absence	type 3	4b	colorful	88	30.1	44.5	29	3.4	hyper	adenoma	medullary cell carcinoma	malignant
female	25	8.7	5.8	9.7	solid	hypo	regular	<1	<1	absence	type 3	4a	colorful	95	16.4	33	16.7	1.4	iso	nodular goiters	nodular goiters	benign
female	46	4.5	3.6	7.8	solid	hypo	regular	<1	<1	absence	type 3	4a	colorful	65.7	16.8	24	17.6	1.6	iso	nodular goiters	nodular goiters	benign
female	48	7.4	5	8.9	solid	hypo	regular	<1	<1	microcalcification	type 2	4c	neg	19.9	12.6	46	29.8	1.7	hyper	nodular goiters	papillar carcinoma	malignant
female	37	5.3	3.7	8.3	solid	hypo	regular	<1	<1	absence	type 3	4a	neg	86	14.9	34.6	18.2	6.8	iso	nodular goiters	nodular goiters	benign
female	41	5.9	4	7.7	solid	hypo	regular	<1	<1	absence	type 3	4a	neg	34.6	16.5	18.8	11.5	1.1	iso	nodular goiters	nodular goiters	benign
female	28	5.8	5.6	9.1	solid	hypo	irregular	<1	<1	absence	type 3	4b	colorful	48	22.9	27	16.5	1.2	iso	nodular goiters	nodular goiters	benign
female	26	5	5.9	8.5	solid	hypo	irregular	>1	>1	absence	type 3	3	colorful	133.7	26.5	38	29.7	3.3	hypo	adenoma	undifferetiated carcinoma	malignant
female	64	7	9.3	7.4	solid	hypo	irregular	>1	>1	absence	type 3	4b	colorful	25.6	9.6	10.5	11.1	1.9	iso	adenoma	nodular goiters	benign
female	37	14.1	11	9.7	solid	hypo	irregular	<1	<1	absence	type 3	4b	colorful	108	28.9	20.9	9.1	1.6	hyper	nodular goiters	nodular goiters	benign
female	47	11	10.9	12.4	solid	hypo	regular	<1	<1	microcalcification	type 3	4b	colorful	44	17.3	42.5	18.4	2.1	iso	nodular goiters	papillar carcinoma	malignant
female	41	9.7	10.6	14.1	solid	hypo	regular	<1	<1	absence	type 3	4c	hard cir-sign	89	20.9	45.08	17	7.5	hypo	adenoma	papillar carcinoma	malignant
male	59	5	5	5.7	solid	iso	regular	<1	<1	absence	type 3	4a	colorful	67	16.3	28	18.4	2.03	iso	nodular goiters	nodular goiters	benign
female	33	8.1	7.8	11.2	solid	hypo	irregular	<1	<1	absence	type 3	4c	colorful	89	25.7	48.9	17.6	3.8	hypo	adenoma	papillar carcinoma	malignant
female	46	9.9	11.2	12	solid	hypo	irregular	<1	>1	microcalcification	type 3	4c	colorful	56.9	13.8	36.6	19.8	3.3	hypo	adenoma	papillar carcinoma	malignant
male	43	5	6.5	6.7	solid	hypo	regular	>1	>1	macrocalcification	type 3	4c	colorful	116	18.9	42	27	0.8	hypo	adenoma	papillar carcinoma	malignant
female	61	8.8	6.5	11.5	solid	hypo	regular	<1	<1	absence	type 1	4c	hard cir-sign	135	21.4	34	25	2.4	hypo	adenoma	papillar carcinoma	malignant
female	29	7.6	6.3	9.3	solid	hypo	regular	<1	<1	absence	type 3	4b	hard cir-sign	60	23.9	28	15.6	1.7	iso	nodular goiters	nodular goiters	benign
female	24	8	5.1	10.1	solid	hypo	regular	<1	<1	absence	type 3	4c	hard cir-sign	14	24.5	29	11.3	7.8	hypo	nodular goiters	nodular goiters	benign
female	50	7.8	5.2	8.5	solid	hypo	regular	<1	<1	absence	type 3	4a	colorful	124	28.4	37	16.2	2.1	iso	nodular goiters	nodular goiters	benign
female	50	8	12.1	15.8	solid	hypo	regular	<1	<1	absence	type 3	4b	hard cir-sign	18	30	31.1	18	0.7	iso	nodular goiters	nodular goiters	benign
male	54	8.2	8.2	10.2	solid	hypo	regular	<1	<1	absence	type 3	4a	colorful	25.6	26.4	30	18.3	8.7	iso	nodular goiters	nodular goiters	benign
female	48	5	6.8	6.8	solid	hypo	irregular	>1	>1	absence	type 3	3	colorful	134.5	27.7	36	16.9	3	hypo	adenoma	nodular goiters	benign
male	35	5	6.4	5	solid	hypo	regular	>1	<1	absence	type 1	4c	colorful	66	31.2	48	22.3	0.9	hypo	adenoma	medullary cell carcinoma	malignant
female	53	5.3	6	7	solid	hypo	regular	<1	<1	absence	type 1	4c	colorful	88	13.6	48	28.7	3.8	hypo	adenoma	papillar carcinoma	malignant
female	43	7.4	7.3	8.1	solid	hypo	regular	<1	<1	absence	type 1	4a	dot-like	118	24.9	30.1	19.4	2.9	iso	nodular goiters	nodular goiters	benign
female	53	6.7	5.2	6.7	solid	hypo	irregular	>1	<1	macrocalcification	type 3	4c	dot-like	107	29.7	41.1	29	2.2	hypo	adenoma	papillar carcinoma	malignant
male	55	5.8	5.6	5.4	solid	extre hypo	irregular	>1	>1	macrocalcification	type 1	4c	colorful	88	28	56	31	3.8	hypo	adenoma	papillar carcinoma	malignant
female	51	12.9	15.6	10.8	solid	hypo	regular	<1	>1	macrocalcification	type 3	4b	colorful	130	23.9	29	17.8	1.2	iso	nodular goiters	nodular goiters	benign
female	54	7.9	10.8	8.2	solid	hypo	regular	>1	>1	absence	type 1	4b	hard cir-sign	128.1	17.5	35	26.8	3.9	iso	adenoma	papillar carcinoma	malignant
female	53	11.7	11.4	11.9	solid	hypo	regular	<1	>1	absence	type 1	5	hard cir-sign	105.2	30.4	21	12.8	1.7	iso	nodular goiters	nodular goiters	benign
female	34	5.5	5	8	solid	hypo	irregular	<1	<1	absence	type 3	4b	colorful	20.1	19.6	24	13.6	1.8	iso	nodular goiters	nodular goiters	benign
female	58	7	6.6	7	solid	hypo	regular	<1	<1	macrocalcification	type 1	4c	colorful	50.5	23.78	30.2	16.9	2.5	hypo	adenoma	nodular goiters	benign
female	48	7.4	9	6.8	solid	hypo	irregular	>1	>1	absence	type 3	4c	colorful	101	19.8	48	21.3	5.8	hypo	adenoma	papillar carcinoma	malignant
male	39	10.6	9.4	15.8	solid	hypo	regular	<1	<1	absence	type 3	4a	colorful	106	18.9	29	16.9	2.9	iso	nodular goiters	nodular goiters	benign
female	54	5.3	6.6	10.1	solid	extre hypo	regular	>1	>1	absence	type 1	4c	hard cir-sign	122.9	11.3	40.8	17.9	7.7	hypo	adenoma	papillar carcinoma	malignant
male	35	25.4	12.8	19.1	solid	hypo	irregular	<1	<1	absence	type 3	4c	hard cir-sign	118	28	39	24	3.7	hypo	adenoma	papillar carcinoma	malignant
female	49	8.7	7.2	9.4	solid	extre hypo	irregular	<1	<1	absence	type 3	5	colorful	24	25.2	36.7	17.4	0.6	hypo	adenoma	papillar carcinoma	malignant
female	53	6.7	6.5	7.3	solid	extre hypo	regular	<1	<1	macrocalcification	type 1	4c	hard cir-sign	115	25.2	43	19.6	3.1	hypo	adenoma	papillar carcinoma	malignant
female	43	9.3	5.8	10.2	solid	hypo	irregular	<1	<1	microcalcification	type 3	4c	colorful	108	23.9	30.6	18.5	3.8	hyper	adenoma	follicular carcinoma	malignant
male	34	9.4	11.8	9.6	solid	extre hypo	regular	>1	>1	absence	type 1	4c	hard cir-sign	88.8	20.9	32.2	16.4	3.4	hypo	adenoma	papillar carcinoma	malignant
female	25	7.2	7.3	8.4	solid	extre hypo	irregular	>1	>1	absence	type 3	4c	colorful	69.5	21.7	28.8	15.9	4.6	hypo	adenoma	papillar carcinoma	malignant
female	27	5	6.4	8.2	solid	hypo	regular	<1	>1	macrocalcification	type 3	4c	colorful	126	26.6	48	15.8	2.8	hypo	adenoma	papillar carcinoma	malignant
male	60	8.8	8	9.5	solid	hypo	regular	<1	<1	absence	type 3	4b	colorful	139	20.4	29	11	1.3	iso	nodular goiters	nodular goiters	benign
female	30	6.6	6.4	5.6	solid	hypo	regular	<1	<1	absence	type 3	4c	colorful	88	30.9	48	19.8	0.9	hypo	adenoma	papillar carcinoma	malignant
female	55	5	5.1	6.2	solid	extre hypo	irregular	>1	>1	absence	type 1	4c	hard cir-sign	67	23.3	38	33.2	2.8	hypo	adenoma	papillar carcinoma	malignant
male	34	10.3	14.9	11.9	solid	extre hypo	irregular	>1	>1	absence	type 3	4c	dot-like	103.2	12.9	38.8	32.3	3	hypo	adenoma	papillar carcinoma	malignant
male	22	15.2	11.8	16.2	solid	hypo	irregular	<1	<1	absence	type 3	3	colorful	89	12.4	35.5	15.8	0.9	hyper	adenoma	nodular goiters	benign
male	35	11.9	10.3	12.5	solid	iso	regular	<1	<1	absence	type 3	4a	colorful	98	27.8	26.8	16.3	1.1	hyper	nodular goiters	nodular goiters	benign
female	34	15	5.4	10.2	solid	extre hypo	irregular	<1	<1	absence	type 3	4c	colorful	68	28.7	25	15.9	4.4	hyper	nodular goiters	subacute thyroiditis	benign
female	37	9.5	8.4	10.4	solid	hypo	regular	<1	<1	absence	type 3	4a	colorful	86	24.7	38	16.5	8.5	iso	nodular goiters	nodular goiters	benign
female	42	6.8	6.5	8.8	solid	hypo	irregular	<1	<1	absence	type 3	4a	hard cir-sign	66	26.6	34	19.3	6.6	iso	nodular goiters	nodular goiters	benign
female	64	9.3	6.8	8.2	solid	hypo	irregular	<1	<1	macrocalcification	type 1	5	hard cir-sign	10.9	17.2	11.9	18.5	7.9	iso	nodular goiters	nodular goiters	benign
female	67	13.1	10.9	26.8	solid	hypo	regular	<1	<1	absence	type 2	4a	colorful	98	20.1	26.8	16.2	2.8	hyper	nodular goiters	nodular goiters	benign
male	29	10.6	6.6	13.1	solid	hypo	irregular	<1	<1	absence	type 3	5	colorful	108	16.5	13.6	17.1	1.5	iso	nodular goiters	nodular goiters	benign
female	47	13.1	13	16.5	solid	hypo	regular	<1	>1	absence	type 3	4a	hard cir-sign	39.8	45	23.1	16.2	1.2	iso	nodular goiters	nodular goiters	benign
female	55	15.6	16.2	28.6	solid	hypo	regular	<1	<1	absence	type 2	4a	hard cir-sign	126	22.2	30.1	18.2	4.8	hyper	nodular goiters	nodular goiters	benign
male	50	10.2	9.7	15.5	solid	hypo	regular	<1	<1	absence	type 2	4a	hard cir-sign	47	25.3	33	15.9	2.3	hyper	nodular goiters	nodular goiters	benign
female	47	7.9	6.7	8.7	solid	hypo	irregular	>1	>1	macrocalcification	type 3	4b	hard cir-sign	138	16.2	35.2	17.4	3	iso	nodular goiters	nodular goiters	benign
female	42	6.3	5	6.6	solid	hypo	regular	<1	<1	absence	type 3	4a	colorful	108	17.3	34	15.4	1.12	iso	nodular goiters	nodular goiters	benign
female	58	5	8.6	5.3	solid	hypo	irregular	>1	>1	absence	type 1	5	colorful	88.7	28.8	46	24.5	5.2	iso	adenoma	papillar carcinoma	malignant
female	59	15.2	17.1	16	solid	hypo	regular	>1	<1	absence	type 3	4a	neg	68.9	22.3	40.8	15.6	3.5	iso	nodular goiters	nodular goiters	benign
female	24	5.7	7.7	7.4	solid	hypo	regular	<1	<1	absence	type 3	5	colorful	71.9	24.3	29.4	16.1	5.5	iso	nodular goiters	nodular goiters	benign
female	59	9.1	10.6	19.4	solid	hypo	irregular	<1	<1	macrocalcification	type 3	4b	colorful	86	15.9	31.5	18.7	0.9	iso	nodular goiters	nodular goiters	benign
male	64	8.1	5.4	8.2	solid	hypo	regular	<1	>1	microcalcification	type 3	5	colorful	88	22.7	23.7	17.5	3.8	iso	nodular goiters	nodular goiters	benign
male	41	9.7	10.2	9.9	solid	hypo	irregular	<1	<1	absence	type 3	4b	hard cir-sign	121	28.9	38	30	4.5	iso	nodular goiters	papillar carcinoma	malignant
female	55	14.1	17.1	28.9	solid	hypo	regular	<1	<1	macrocalcification	type 1	4b	hard cir-sign	68.9	18.1	40.8	17.2	3.8	iso	nodular goiters	nodular goiters	benign
female	49	7.5	6.6	13.8	solid	hypo	regular	<1	<1	absence	type 3	4a	colorful	67	18.3	15.8	17.8	0.8	iso	nodular goiters	nodular goiters	benign
female	63	11	8.5	16.9	solid	hypo	regular	<1	<1	absence	type 3	5	colorful	49.9	18	38	16.1	1.4	iso	nodular goiters	nodular goiters	benign
female	55	6.8	7.6	9	solid	hypo	irregular	<1	<1	macrocalcification	type 3	4b	hard cir-sign	102	16	26	16.4	5.1	iso	nodular goiters	nodular goiters	benign
female	50	7.7	7.7	8.4	solid	hypo	irregular	<1	>1	macrocalcification	type 3	4b	neg	38.7	17.6	48	24.7	3.06	iso	adenoma	papillar carcinoma	malignant
female	48	10.3	6.6	12.6	solid	hypo	regular	<1	<1	macrocalcification	type 1	4a	colorful	119	18.9	28.8	15.7	0.9	iso	nodular goiters	nodular goiters	benign
female	50	16.6	11.1	17.1	solid	hypo	regular	<1	<1	absence	type 3	4a	colorful	129	17	18.5	12.6	3.3	iso	nodular goiters	nodular goiters	benign
female	26	23.1	18.4	29.8	solid	hypo	regular	<1	<1	absence	type 1	4a	neg	116	19.3	14.8	11	1.2	iso	nodular goiters	nodular goiters	benign
